# Supplementary material for: Comparison of bovine serum albumin and chitosan effects on calcium phosphate formation in the presence of silver nanoparticles
Source: Royal Society of Chemistry journal article supplement (doi:10.1039/d3ra02115g), 2023-01-01
Supplement: d3ra02115g1.pdf [file d3ra02115g1.pdf]

**Supplementary Information for:**

**Comparison of bovine serum albumin and chitosan effect on calcium phosphate formation in the presence of silver nanoparticles**

Suzana Inkret,<sup>a</sup> Ina Erceg,<sup>a</sup> Marija Ćurlin,<sup>b</sup> Nikolina Kalčec,<sup>c</sup> Nikolina Peranić,<sup>c</sup> Ivana Vinković Vrček,<sup>c</sup> Darija Domazet Jurašin,<sup>a</sup> Maja Dutour Sikirić<sup>a,\*</sup>

<sup>a</sup>Laboratory for Biocolloids and Surface Chemistry, Division of Physical Chemistry, Ruđer Bošković Institute, Bijenička cesta 54, 10000 Zagreb, Croatia

<sup>b</sup>School of Medicine, Catholic University of Croatia, 10000 Zagreb, Croatia

<sup>c</sup>Institute for Medical Research and Occupational Health, Ksaverska cesta 2, Zagreb, 10000, Croatia

**Content of listed material:**

**Figure SI 1.** Volume size distribution of bovine serum albumin, chitosan and differently stabilized silver nanoparticles in anionic reactant solution.

**Figure SI 2.** Representative pH vs. time curves obtained in investigated precipitation systems.

**Figure SI 3.** FTIR spectra of amorphous precipitates formed in investigated precipitation systems.

**Figure SI 4.** TEM micrographs of amorphous precipitates formed in the precipitation systems containing bovine serum albumin.

**Figure SI 5.** TEM micrographs of amorphous precipitates formed in the precipitation systems containing chitosan.

**Figure SI 6.** FTIR spectra of crystalline precipitates formed in the investigated precipitation systems.

**Figure SI 7.** FTIR spectra and corresponding first- and second-order derivatives of crystalline precipitates formed in the precipitation systems containing bovine serum albumin.

**Figure SI 8.** FTIR spectra and corresponding first- and second-order derivatives of crystalline precipitates formed in the precipitation systems containing chitosan.

**Figure SI 9.** SEM micrographs of crystalline precipitates formed in the precipitation systems containing bovine serum albumin.

**Figure SI 10.** SEM micrographs of crystalline precipitates formed in the precipitation systems containing chitosan.

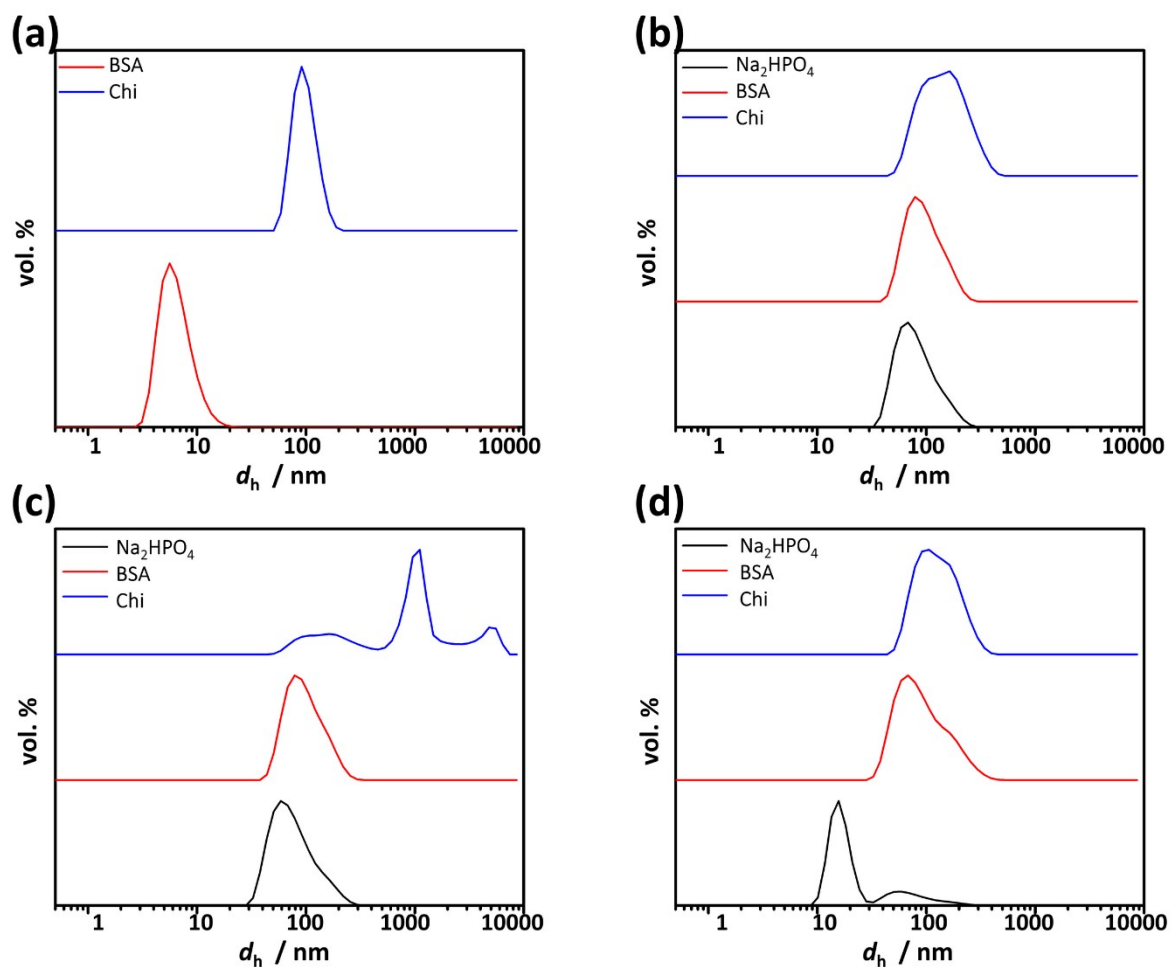

**Figure SI 1.** Volume size distribution of a) BSA and Chi, silver nanoparticles (AgNPs), stabilized with b) sodium bis(2-ethylhexyl) sulfosuccinate (AOT-AgNPs), c) poly(vinylpyrrolidone) (PVP-AgNPs), d) citrate (cit-AgNPs) suspended in anionic reactant solution ( $c(\text{Na}_2\text{HPO}_4) = 8 \cdot 10^{-3} \text{ mol dm}^{-3}$ ,  $\gamma(\text{AgNPs}) = 20 \text{ mg dm}^{-3}$ , pH 7.4) in the presence or absence of bovine serum albumin (BSA,  $\gamma = 200 \text{ mg dm}^{-3}$ ) or chitosan (Chi,  $\gamma = 50 \text{ mg dm}^{-3}$ ) at 25 °C.

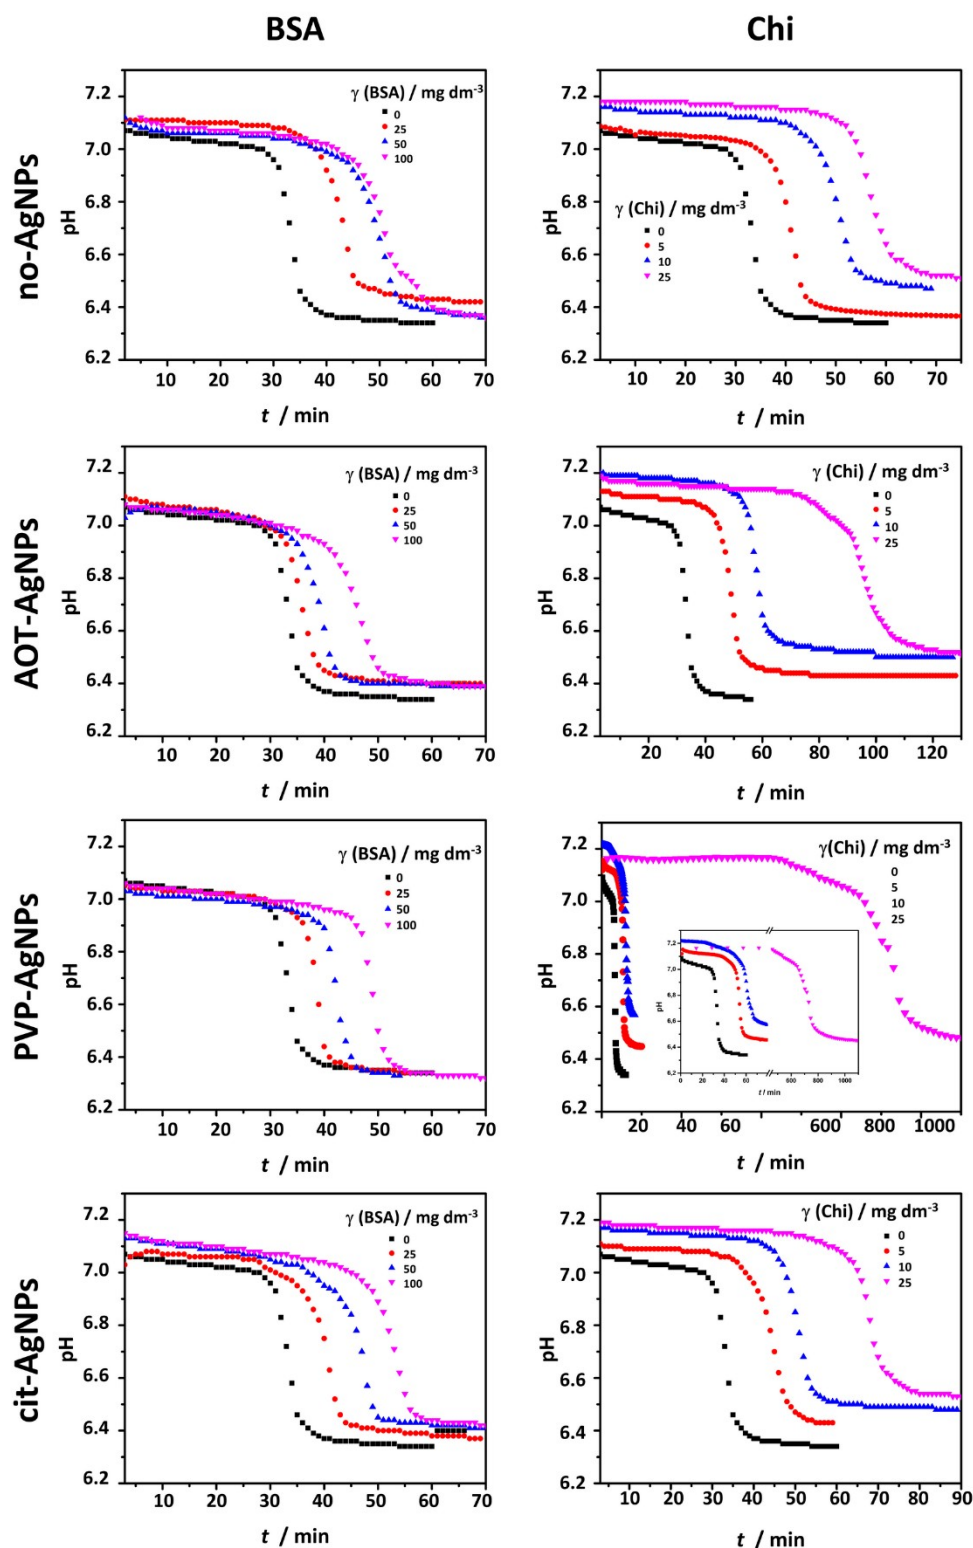

**Figure SI 2.** Representative pH vs. time curves obtained in the control system and in the presence of different concentrations of bovine serum albumin (BSA) and chitosan (Chi) in the presence or absence of  $10 \text{ mg dm}^{-3}$  of silver nanoparticles (AgNPs) stabilized with sodium bis(2-ethylhexyl) sulfosuccinate (AOT-AgNPs), poly(vinylpyrrolidone) (PVP-AgNPs), and citrate (cit-AgNPs).  $c(\text{CaCl}_2) = c(\text{Na}_2\text{HPO}_4) = 4 \cdot 10^{-3} \text{ mol dm}^{-3}$ , pH 7.4, 25 °C.

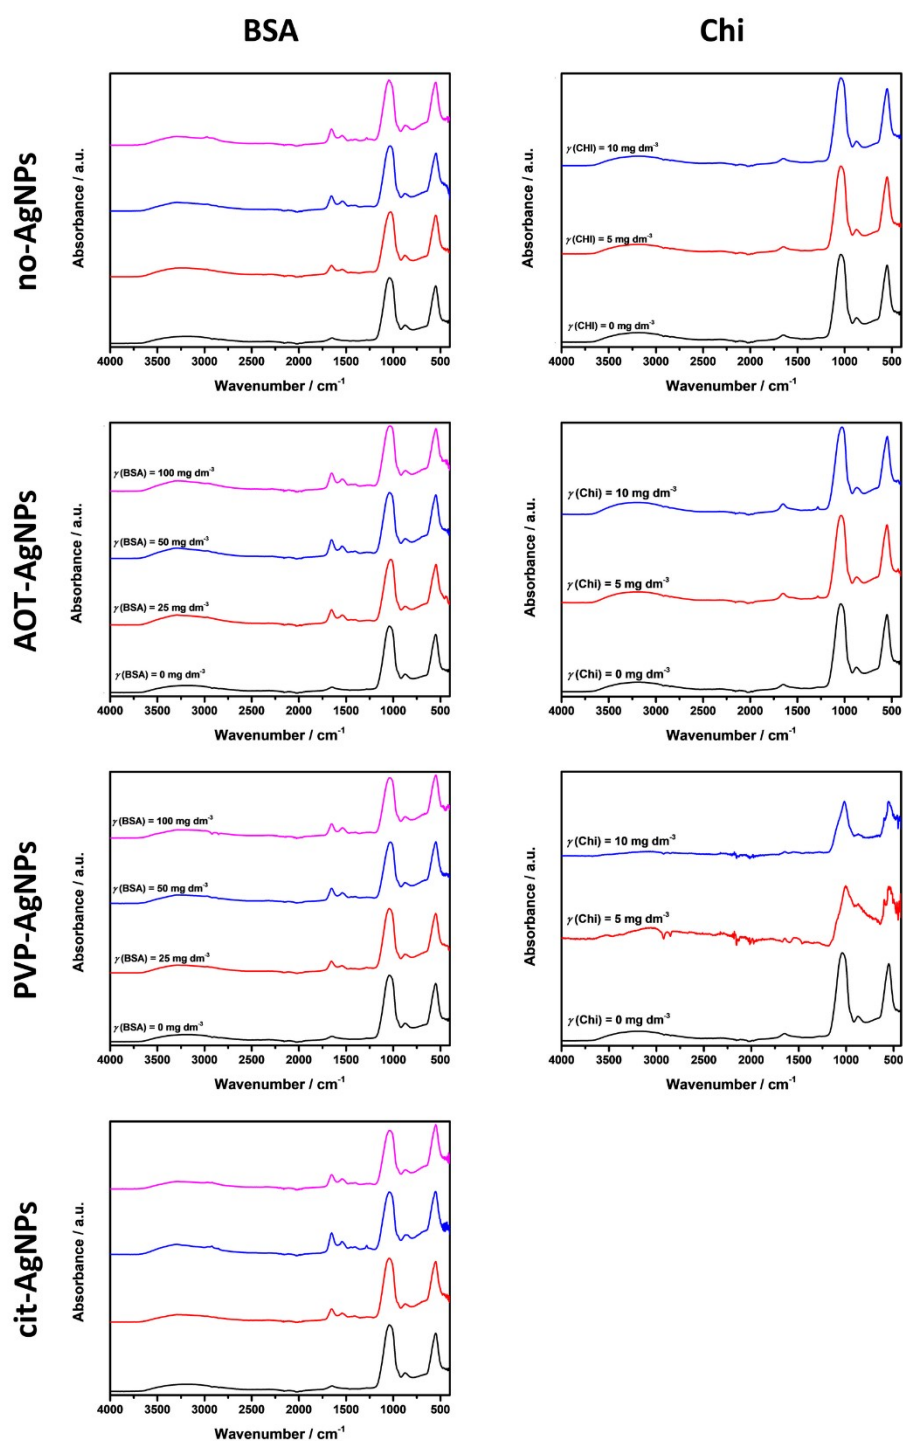

**Figure SI 3.** FTIR spectra of amorphous precipitates obtained in the control system and the presence of the different concentrations of bovine serum albumin (BSA) or chitosan (Chi) in the absence and presence of  $10 \text{ mg dm}^{-3}$  of silver nanoparticles (AgNPs) stabilized sodium bis(2-ethylhexyl) sulfosuccinate (AOT-AgNPs), poly(vinylpyrrolidone) (PVP-AgNPs), and citrate (cit-AgNPs).  $(\text{CaCl}_2) = c(\text{Na}_2\text{HPO}_4) = 4 \cdot 10^{-3} \text{ mol dm}^{-3}$ , pH 7.4, 25 °C.

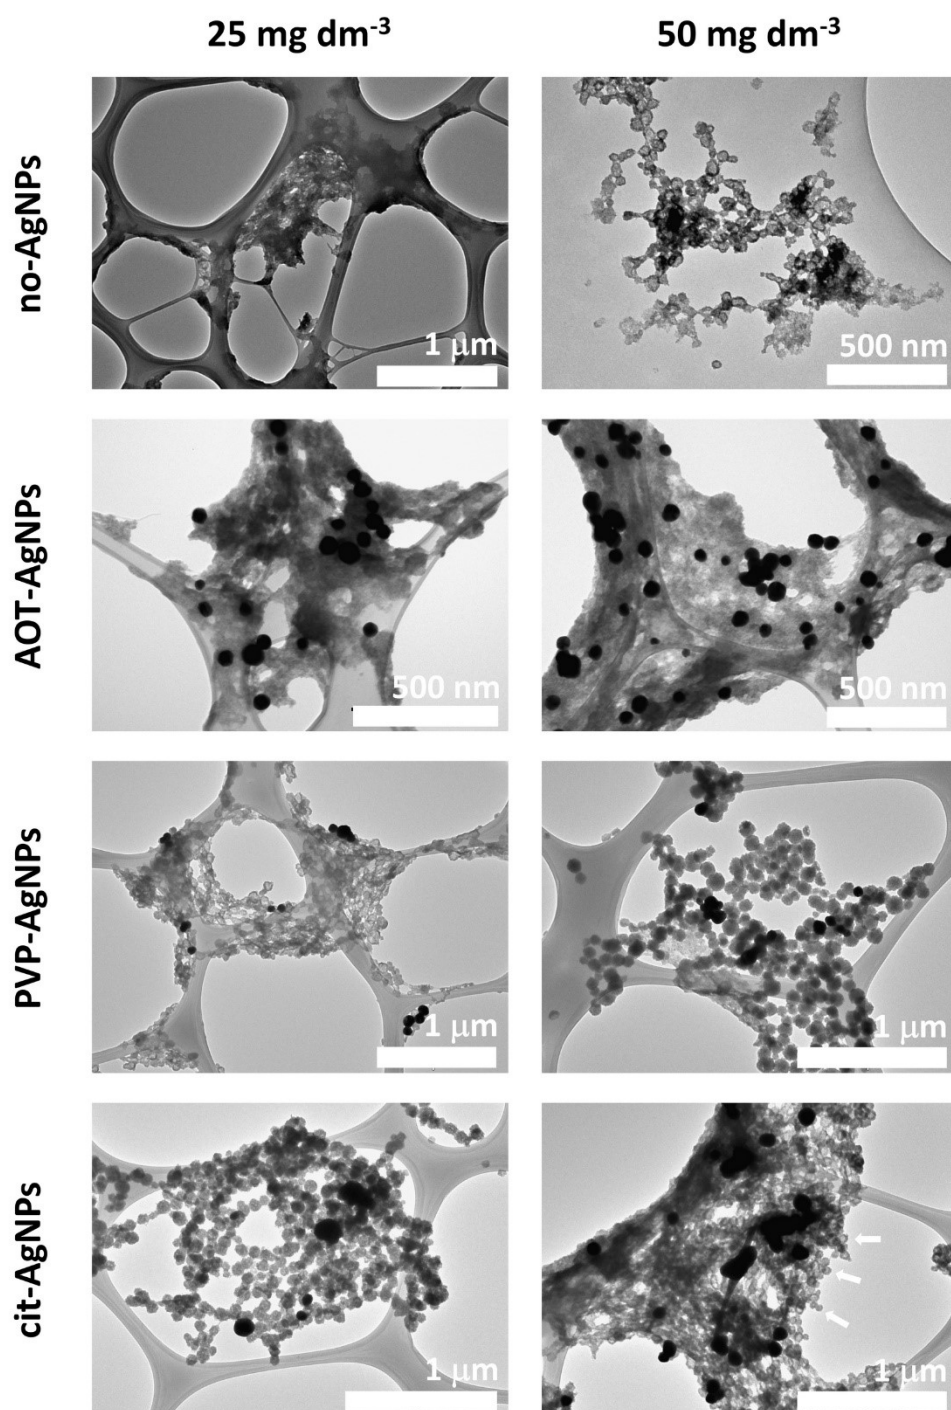

**Figure SI 4.** TEM micrographs of amorphous precipitates obtained in the control system and the presence of the different concentrations of bovine serum albumin (BSA) in the absence and presence of 10 mg dm<sup>-3</sup> of silver nanoparticles (AgNPs) stabilized with sodium bis(2-ethylhexyl) sulfosuccinate (AOT-AgNPs), poly(vinylpyrrolidone) (PVP-AgNPs), and citrate (cit-AgNPs). ( $\text{CaCl}_2$ ) =  $c(\text{Na}_2\text{HPO}_4)$  =  $4 \cdot 10^{-3}$  mol dm<sup>-3</sup>, pH 7.4, 25 °C. White arrows point to spherical ACP particles.

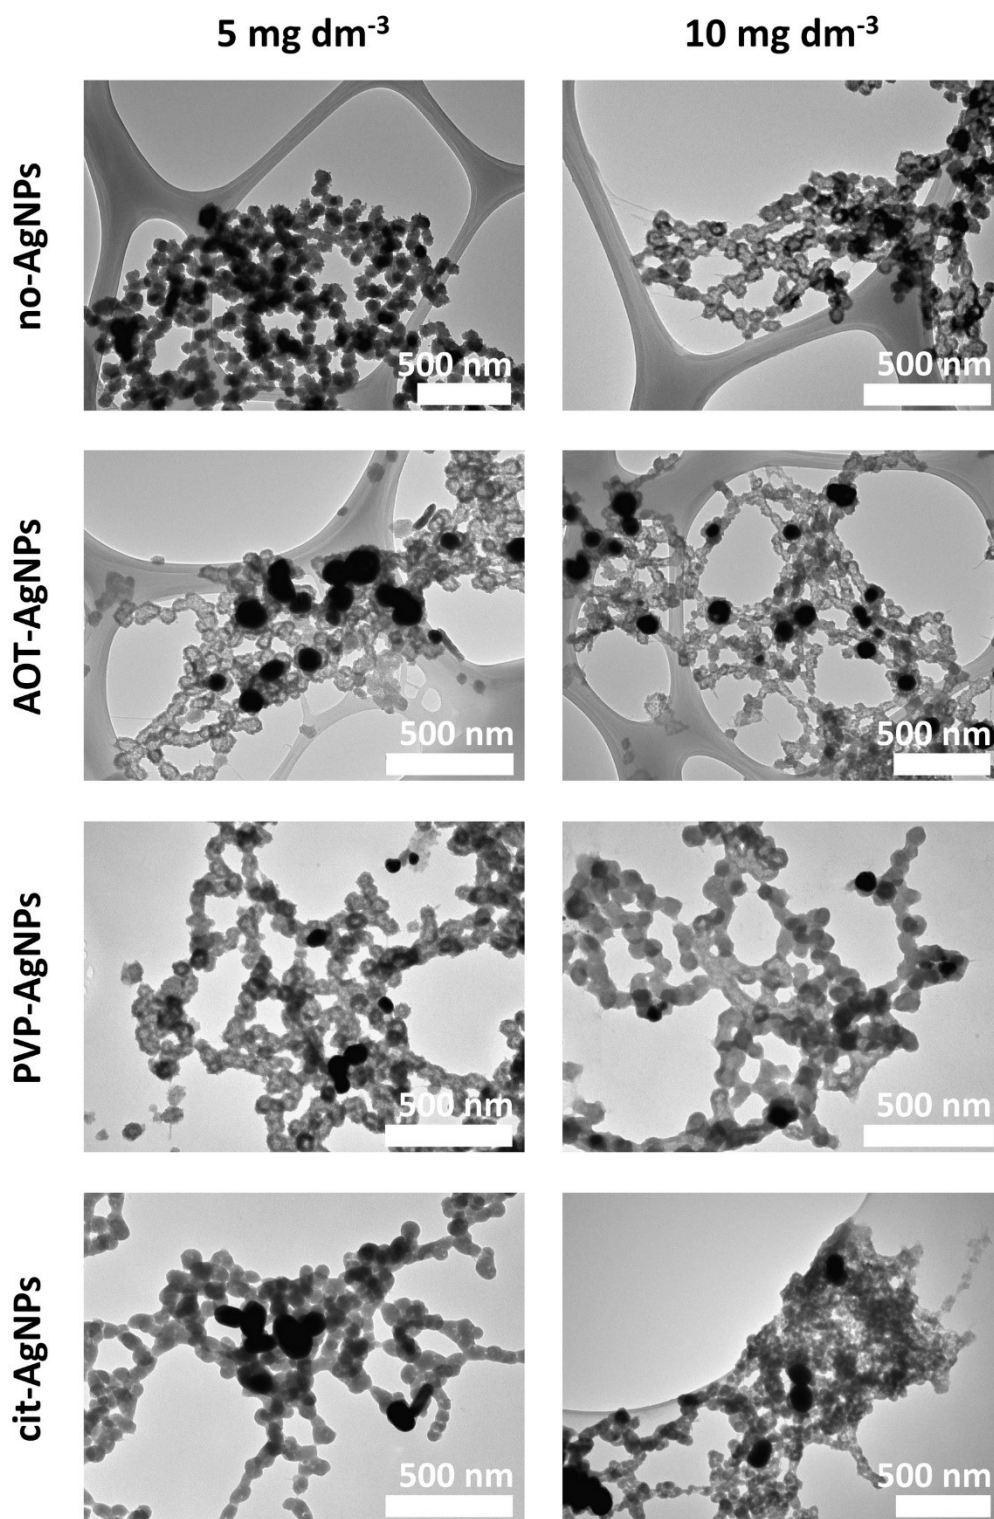

**Figure SI 5.** TEM micrographs of amorphous precipitates obtained in the control system and in the presence of the different concentrations of chitosan (Chi) in the absence and presence of 10 mg dm<sup>-3</sup> of silver nanoparticles (AgNPs) stabilized with sodium bis(2-ethylhexyl) sulfosuccinate (AOT-AgNPs), poly(vinylpyrrolidone) (PVP-AgNPs), and citrate (cit-AgNPs). (CaCl<sub>2</sub>) = c(Na<sub>2</sub>HPO<sub>4</sub>) = 4 · 10<sup>-3</sup> mol dm<sup>-3</sup>, pH 7.4, 25 °C.



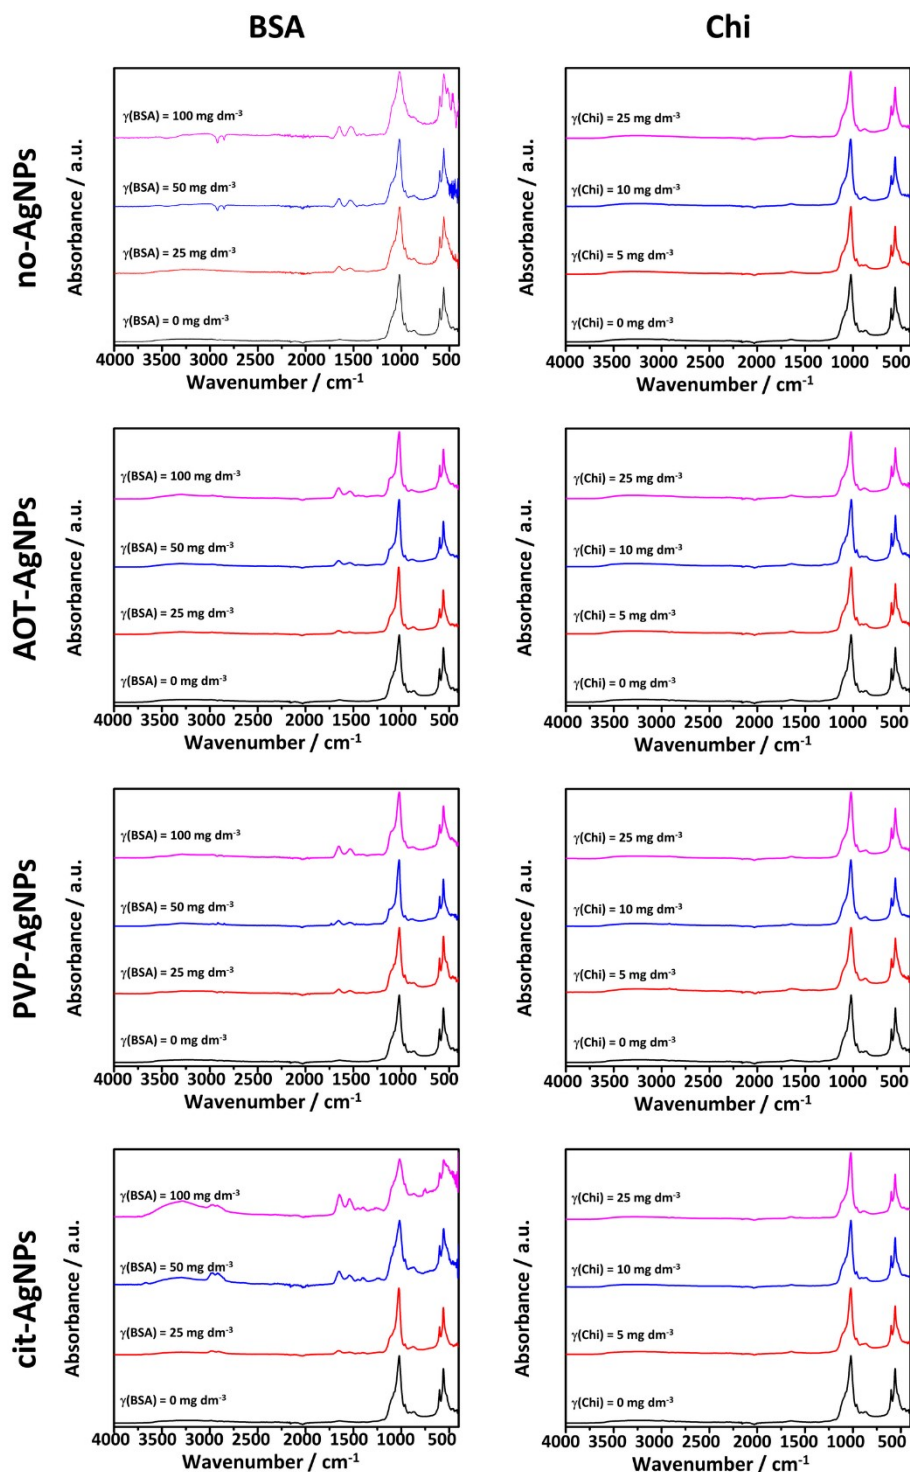

**Figure SI 6.** FTIR spectra of crystalline precipitates obtained in the control system and in the presence of the different concentrations of bovine serum albumin (BSA) or chitosan (Chi) in the absence and presence of  $10 \text{ mg dm}^{-3}$  of silver nanoparticles (AgNPs) stabilized with sodium bis(2-ethylhexyl) sulfosuccinate (AOT-AgNPs), poly(vinylpyrrolidone) (PVP-AgNPs), and citrate (cit-AgNPs). ( $\text{CaCl}_2$ ) =  $c(\text{Na}_2\text{HPO}_4)$  =  $4 \cdot 10^{-3} \text{ mol dm}^{-3}$ , pH 7.4, 25 °C.



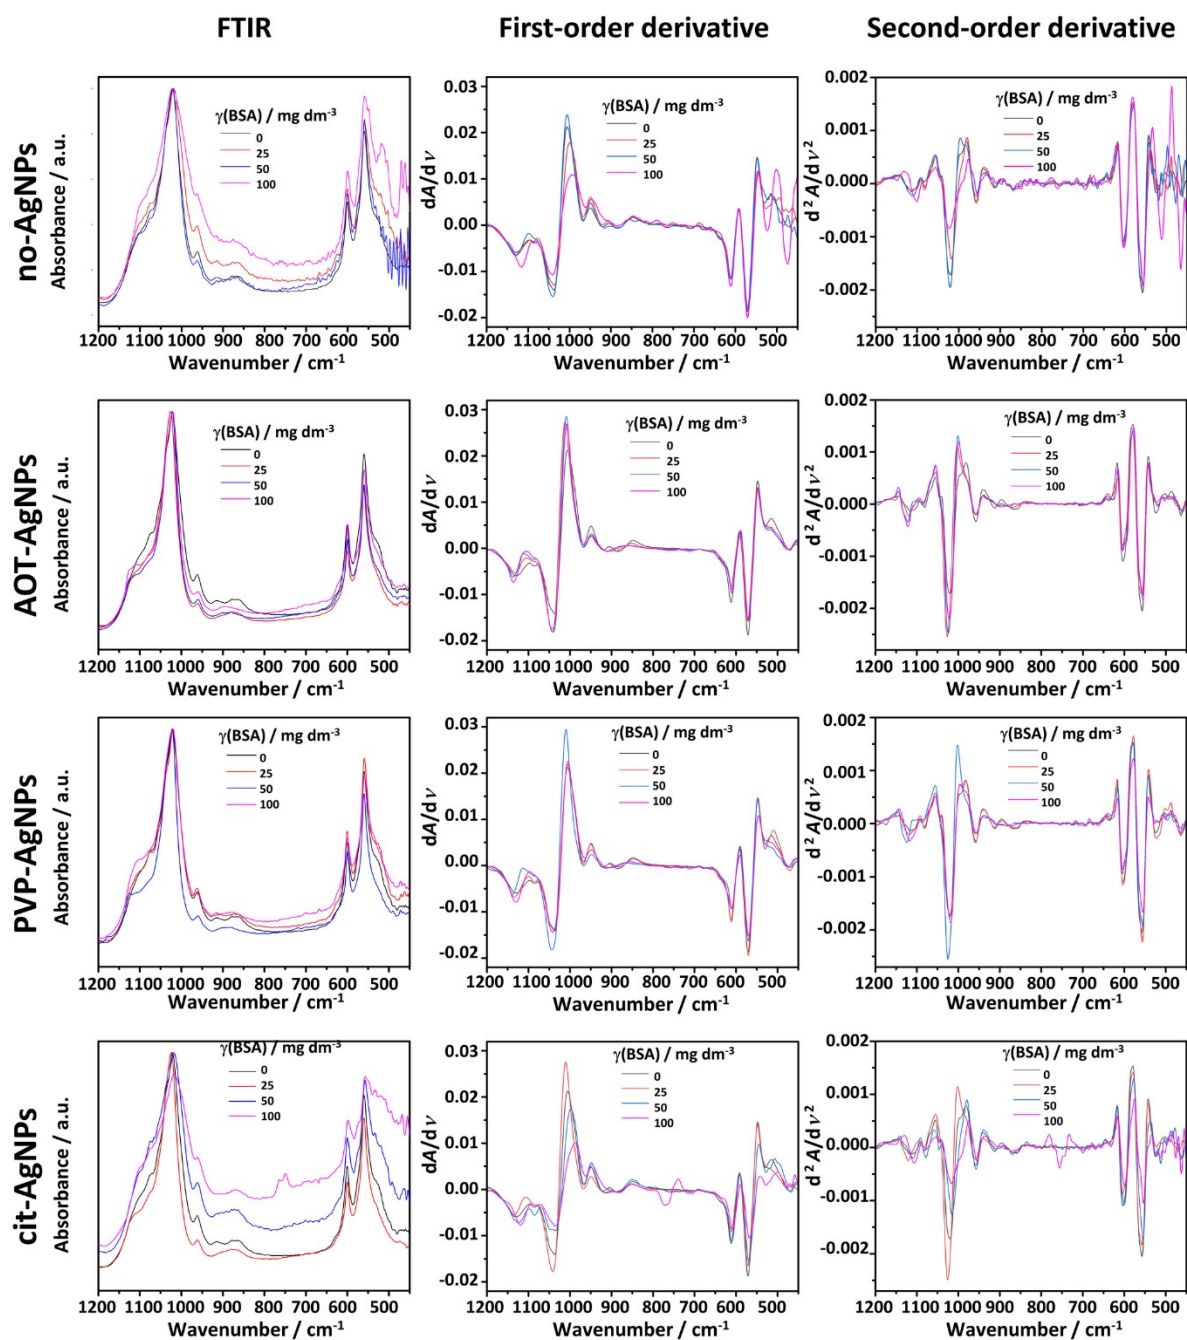

**Figure SI 7.** FTIR spectra and corresponding first- and second-order derivatives of crystalline precipitates obtained in the control system and in the presence of the different concentrations of bovine serum albumin (BSA) in the absence and presence of 10 mg dm<sup>-3</sup> of silver nanoparticles (AgNPs) stabilized with sodium bis(2-ethylhexyl) sulfosuccinate (AOT-AgNPs), poly(vinylpyrrolidone) (PVP-AgNPs), and citrate (cit-AgNPs). (CaCl<sub>2</sub>) = c(Na<sub>2</sub>HPO<sub>4</sub>) = 4 · 10<sup>-3</sup> mol dm<sup>-3</sup>, pH 7.4, 25 °C.

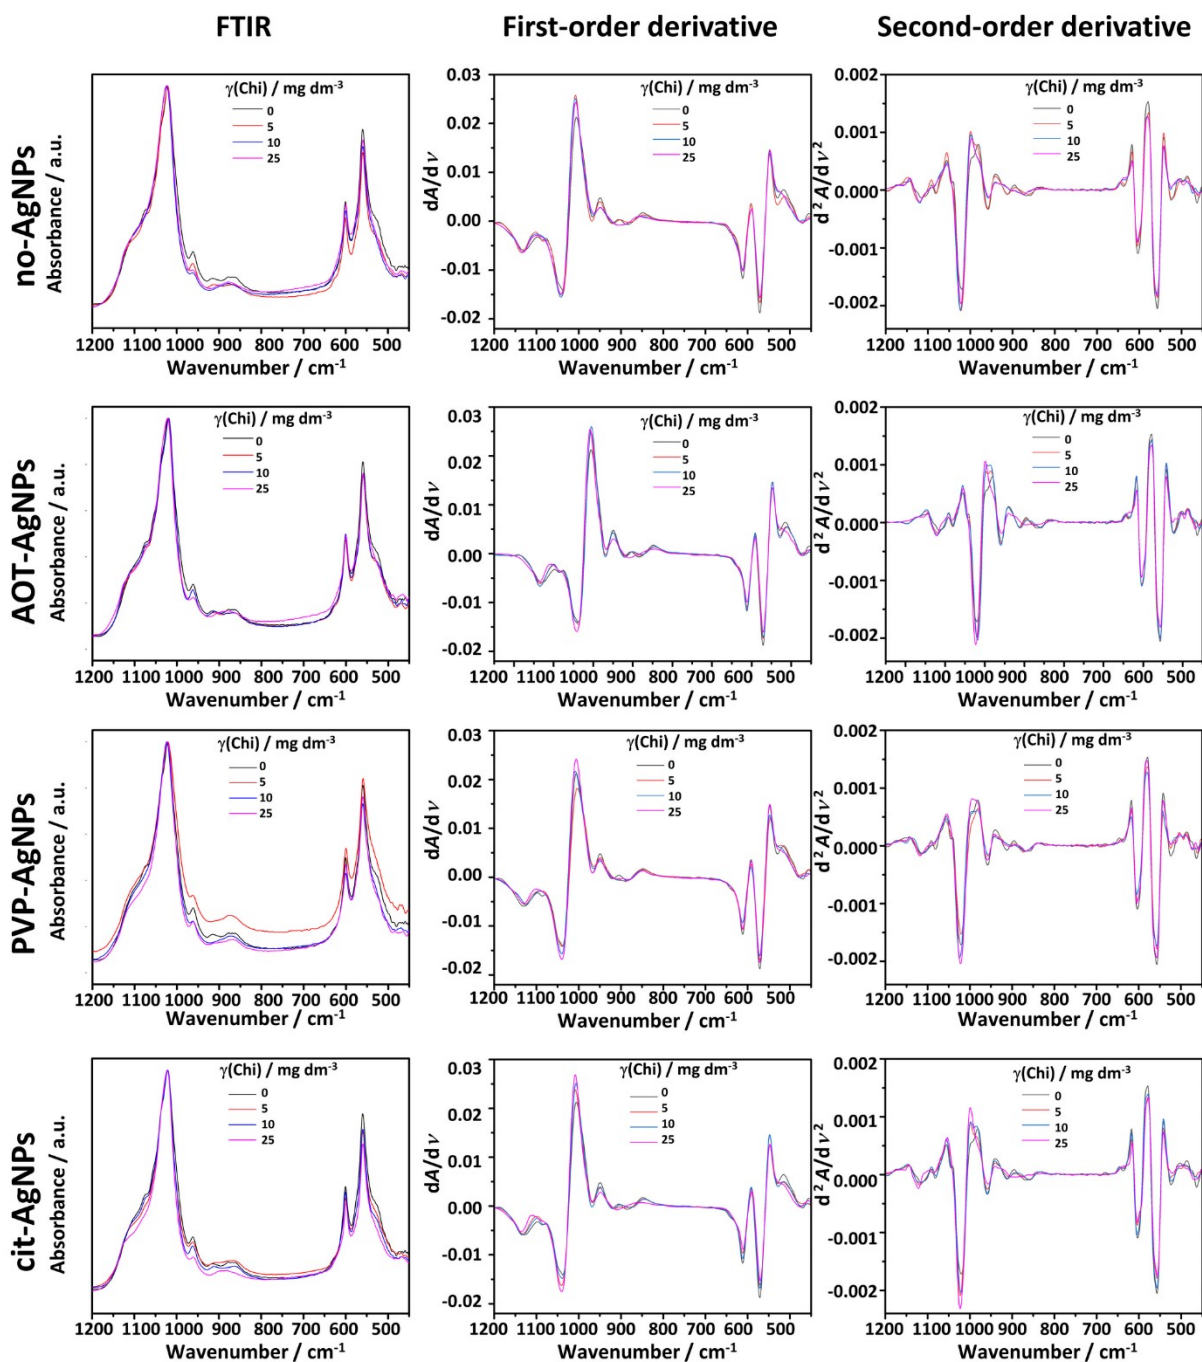

**Figure SI 8.** FTIR spectra and corresponding first- and second-order derivatives of crystalline precipitates obtained in the control system and in the presence of different concentrations of chitosan (Chi) in the absence and presence of  $10 \text{ mg dm}^{-3}$  of silver nanoparticles (AgNPs) stabilized with sodium bis(2-ethylhexyl) sulfosuccinate (AOT-AgNPs), poly(vinylpyrrolidone) (PVP-AgNPs), and citrate (cit-AgNPs).  $(\text{CaCl}_2) = c(\text{Na}_2\text{HPO}_4) = 4 \cdot 10^{-3} \text{ mol dm}^{-3}$ , pH 7.4,  $25^\circ\text{C}$ .

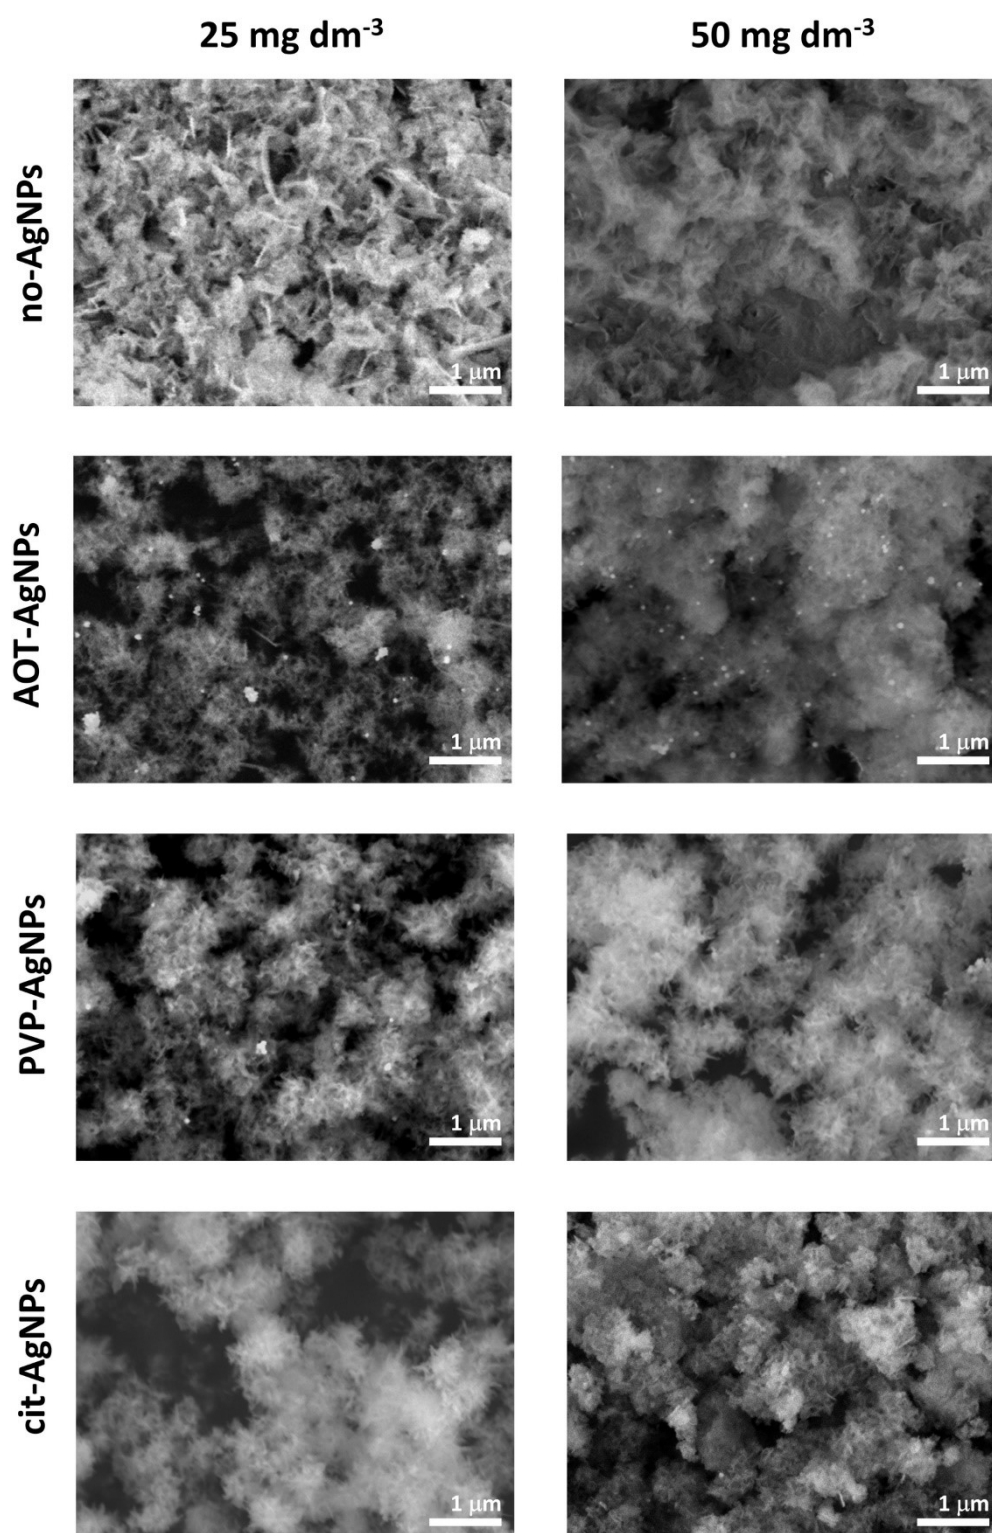

**Figure SI 9.** SEM micrographs of crystalline precipitates obtained in the control system and in the presence of the different concentrations of bovine serum albumin (BSA) in the absence and presence of 10 mg dm<sup>-3</sup> of silver nanoparticles (AgNPs) stabilized with sodium bis(2-ethylhexyl) sulfosuccinate (AOT-AgNPs), poly(vinylpyrrolidone) (PVP-AgNPs), and citrate (cit-AgNPs). ( $\text{CaCl}_2$ ) =  $c(\text{Na}_2\text{HPO}_4)$  =  $4 \cdot 10^{-3}$  mol dm<sup>-3</sup>, pH 7.4, 25 °C.

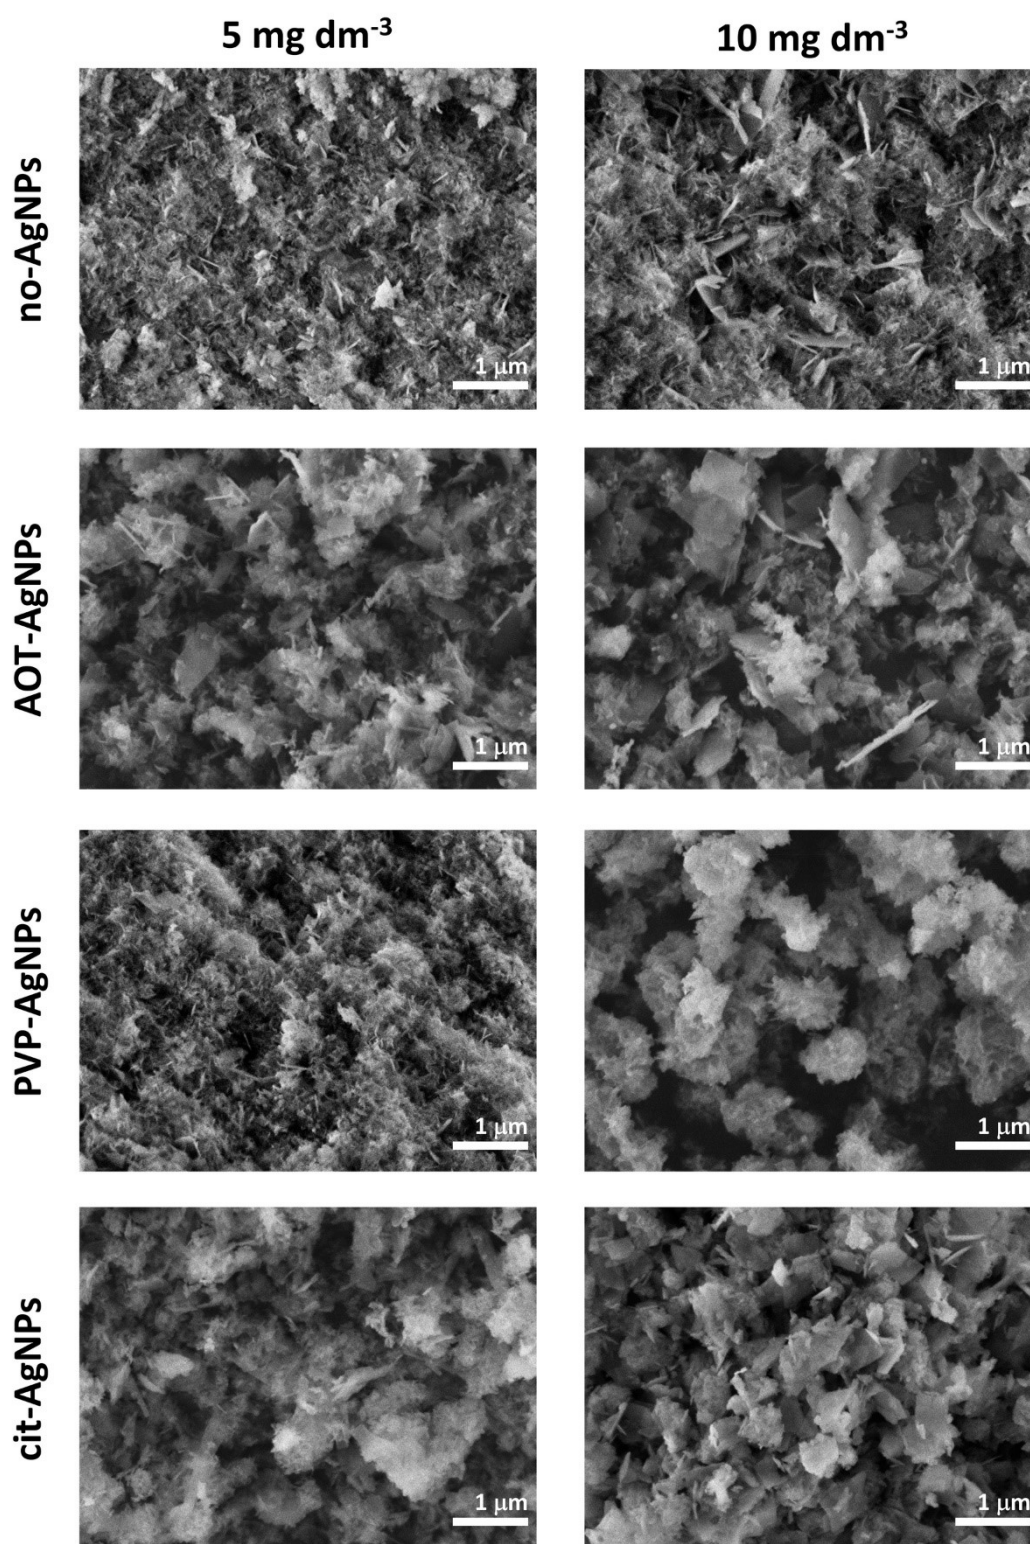

**Figure SI 10.** SEM micrographs of crystalline precipitates obtained in the control system and in the presence of different concentrations of chitosan (Chi) in the absence and presence of 10 mg dm<sup>-3</sup> of silver nanoparticles (AgNPs) stabilized with sodium bis(2-ethylhexyl) sulfosuccinate (AOT-AgNPs), poly(vinylpyrrolidone) (PVP-AgNPs), and citrate (cit-AgNPs). ( $\text{CaCl}_2$ ) =  $c(\text{Na}_2\text{HPO}_4)$  =  $4 \cdot 10^{-3}$  mol dm<sup>-3</sup>, pH 7.4, 25°C.
